# Supplementary material for: The Genome Landscape of the African Green Monkey Kidney-Derived Vero Cell Line
Source: PubMed Central journal article supplement (PMC4263300; doi:10.1093/dnares/dsu029), 2014-09-28
Supplement: supp_dsu029_dsu029supp.pdf [file supp_dsu029_dsu029supp.pdf]

1 **Supplementary Information to:**

2 **The genome landscape of the African green monkey kidney-derived Vero cell line**

3  
4 **Table of Content**

5 Supplementary materials and methods. ----- 2

6 References associate with supplementary materials and methods. ----- 7

7 Legends to supplementary figures. ----- 9

8 Table S1. Summary of genome-sequencing libraries of Vero JCRB0111 cells. ----- 10

9 Table S2. Comparison of mitochondrial genome sequences between the Vero cell line and  
10 *Chlorocebus* species. ----- 11

11 Table S3. Number of SNVs and small indels in the Vero cell line genome using the rhesus macaque  
12 genome sequence as a reference. ----- 12

13 Table S4. Summary of large deletions in the Vero JCRB0111 cell genome. ----- 13

14 Table S5. Single nucleotide mutation and insertion position and mix population rate of the truncated  
15 SRV provirus sequence in Vero JCRB0111. ----- 15

16 Table S6. PCR primers used to validate deletions. ----- 16

17 Figure S1. Karyotyping of AGM PBMC and Vero cells. ----- 17

18 Figure S2. Sequence analyses of genomic deletions in Vero cells. ----- 18

19 Figure S3. Distribution of heterozygous SNV density and the homozygous to heterozygous SNV  
20 ratio in the 1Mb-size window. ----- 23

21  
22

1 **Supplementary materials and methods**

2

3 **Cell culture**

4           The peripheral blood mononuclear cells (PBMC) of female African green monkeys (AGMs)  
5 were obtained from the Tsukuba Primate Research Center of National Biomedical Innovation and  
6 cultured in RPMI-1640 medium (Life Technology, Grand Island, NY) supplemented with 4%  
7 phytohaemagglutinin-M (Life Technology, Grand Island, NY) and 200 U/ml IL-2 (Sigma-Aldrich, St.  
8 Louis, MO). Vero JCRB0111 cells and Vero ATCC (CCL81) cells were maintained in Eagle's  
9 minimal essential medium (Life Technology, Grand Island, NY). Both media had 10%  
10 heat-inactivated (56°C for 30 min) fetal bovine serum (Sigma-Aldrich, St. Louis, MO). Cells were  
11 cultured at 37°C under an atmosphere of 5% CO<sub>2</sub> and 100% humidity.

12

13 **Tumorigenicity test**

14           Tumorigenicity was tested by injecting  $1 \times 10^7$  cells subcutaneously into BALB/cAJcl-nu  
15 female mice (Nihon Clea, Japan) at 6 weeks of age and measuring the sizes of the resulting tumors at  
16 least once a week for 12 weeks. Animal protocols were approved by the committee for the Ethics of  
17 Animal Experimentation and were in accordance with the Guidelines for Animal Experiments in the  
18 National Institute Biomedical Innovation.

19

20 **Karyological analysis**

21           Metaphase chromosomes from Vero cells and PBMC were harvested after incubation with  
22 0.05 µg/ml Metaphase Arresting Solution (Genial Genetics, Chester, UK) at 37°C for 4 hours,  
23 followed by treatment with a hypotonic solution (75 mM KCl) for 30 min and three successive  
24 changes of the fixative solution (methanol/acetic acid, 3:1 by vol./vol.). The nuclear suspensions  
25 were dropped onto clean slides and aged at 85°C for 45 min prior to the Giemsa-banding

1 (G-banding) and multi-color fluorescence *in situ* hybridization (M-FISH) experiments. M-FISH  
2 using 24 differentially labeled human chromosome-specific painting probes (24xCyte kit  
3 MetaSystems, Altussheim, Germany) was performed according to the manufacturer's protocol.  
4 Briefly, the slides were incubated at 70°C in saline solution (2x saline sodium citrate buffer) for 30  
5 min, denatured in 0.07M NaOH for 1 min, dehydrated in ethanol series, air-dried, covered with 10 µl  
6 of probe cocktail (denatured), and hybridized for 4 days at 37°C. After post-hybridization washing at  
7 72°C, the slides were dehydrated in ethanol series and counter-stained with 10 µl of  
8 4',6-diamidino-2-phenylindole (DAPI)/antifade. The signals were captured and analyzed by the  
9 Metafer system and MetaSystems' ISIS software (software for spectral karyotypes).

10

### 11 ***De Novo assembly***

12 A custom service for the construction of DNA libraries for paired ends with the TruSeq  
13 DNA Sample Prep Kit (Illumina Inc.) was provided by Hokkaido System Science Co. (Sapporo,  
14 Japan), while libraries for mate pairs were constructed by the Long Jump Distance service (Eurofins  
15 Genomics GmbH, Ebersberg, Germany).<sup>1,2</sup> After massively parallel sequencing of the libraries,  
16 adaptor sequence removal and quality filtering were performed using CutAdapt software<sup>3</sup> with the  
17 BWA trimming algorithm and the parameter of Q20 for paired-end sequences. To reduce the  
18 mis-assembly rate, potential PCR duplicate reads were filtered out using the mapping information to  
19 the AGM genome (see Materials and methods in the main text). After filtering, error correction and  
20 constructing contigs were conducted using the pipeline of SGA software,<sup>4</sup> which yielded the longest  
21 contig N50 length over other different assembly software for our data (data not shown). The *k*-mer  
22 used for error correction was 61 and overlap length parameters for the FM-merge and assemble  
23 processes were 65 and 75, respectively. After assembling contigs, they were connected using three  
24 mate-pair library sequences of different insert lengths, as well as paired-end sequences  
25 (Supplementary Table 1). Contigs longer than 200 bp were used for scaffolding by the SSPACE

1 software<sup>5</sup> with a minimal link parameter ( $k$ ) of 5 and maximum ratio parameter ( $a$ ) of 0.7. Regarding  
2 scaffolding, libraries were added to scaffolding in an ascending manner with respect to the insert size  
3 length.

4

## 5 **RNA-seq**

6 Total RNA was extracted from Vero JCRB0111 cells, and purified on RNeasy spin columns  
7 (Qiagen) according to the manufacturer's instructions. The mRNA fraction was enriched with the  
8 FastTrack MAG micro mRNA isolation kit (Invitrogen), according to the manufacturer's instructions.  
9 A cDNA library was then synthesized from 10 ng of the enriched mRNA with the ScriptSeq™ v2  
10 RNA-Seq Library Preparation Kit (Epicentre, Biotechnologies, Madison, WI) with 15 cycles of  
11 amplification according to the manufacturer's instructions. The RNA-seq library was electrophoresed  
12 on 1% agarose gel and the library with a selected size range (250–700 bp) having specific adapters  
13 was purified with the Wizard® SV Gel and PCR Clean-Up System (Promega). The RNA-seq library  
14 was subjected to 81–mer paired–end sequencing with Genome Analyzer Iix (Illumina Inc) for  
15 whole-transcriptome sequencing. Sequencing reads obtained were 20,104,436 pairs.

16

## 17 **Phylogenetic analysis**

18 For phylogenetic analysis of mitochondrial genomes of the Vero cell line, four *Chlorocebus*  
19 species, and *Macaca mulatta* (Genbank accession numbers: NC\_007009, NC\_009747, NC\_008066,  
20 and NC\_009748), the alignment of paired-end reads to *C. sabaues* was used to generate a consensus  
21 sequence of the Vero cell line mitochondrial genome. Whole mitochondrial genomes were analyzed  
22 using MEGA6 software.<sup>6</sup> The MUSCLE algorithm<sup>7</sup> and Neighbor-joining method<sup>8</sup> with Kimura's  
23 2-parameter distance<sup>9</sup> were used for alignment and tree reconstruction, respectively.

24

## 25 **Detection of genomic rearrangements in the Vero JCRB0111 cell line**

1           Although we selected candidate regions that were supported by multiple split reads, these  
2 junction sequences were not present in the draft assembly sequence of AGM due to the  
3 incompleteness of the draft genome. Therefore, we searched the junction sequences against the draft  
4 genome sequences of AGM and rhesus macaque (rheMac2) using BWA, and filtered out the  
5 candidate regions when the predicted junction sequences were mapped on the draft genome  
6 sequences across the boundaries.

7           It may be noteworthy that a total of 651 deletions, 126 duplications, 103 inversions, and 312  
8 translocations were putatively identified by a bioinformatic analysis with loose criteria (number of  
9 paired-end support and split-read  $\geq 5$ ); however, many of the putative translocation sites were not  
10 validated by PCR analysis with primer sets striding the putative breakpoints, which suggested that  
11 the loose criteria may have produced many false-positive sites.

### 12

### 13 **PCR and Sanger sequencing analyses of chromosomal deletions**

14           The genomic DNAs of Vero JCRB0111 cells, Vero ATCC (CCL81) cells, and PBMC were  
15 isolated with the Blood Genomic DNA Extraction Mini Kit (Favorgen, Ping-Tung, Taiwan). Primers  
16 were designed based on information of the predicted junction regions (Supplementary Table 6). PCR  
17 was performed with PrimeSTAR GXL (Takara Bio, Ohtsu, Japan) on equal amounts of genomic  
18 DNA. The PCR products were separated by agarose gel electrophoresis, and stained with ethidium  
19 bromide, using the 1-Kb Plus DNA Ladder (Life Technology) as a molecular marker. When PCR  
20 products were detected, they were also subjected to Sanger sequencing with the ABI3100 Genetic  
21 Analyzer (Applied Biosystems).

22

### 23 **Characterization of proviral simian type D retrovirus (SRV) in the Vero JCRB0111 genome**

24           To identify nucleotide variations and the redundancy of endogenous SRV, SRV-related short  
25 reads from all paired-end short reads (insert size avg.: 317 bp) of the Vero JCRB0111 cell line were

1 collected using the Burrows-Wheeler Aligner (BWA) Smith-Waterman alignment (SW) mapping  
2 technique<sup>10,11</sup> with 15 complete genome sequences of SRV as reference sequences. The short reads  
3 (0.025%) obtained were assembled by platanus v1.21, followed by PRICE<sup>12</sup> extending at a 100%  
4 identity cut-off and gap-closing between contigs. A single reasonable contig (9.2 kb) was obtained,  
5 followed by gene assignment and LTR finding analysis, which suggested that the 8367 bp complete  
6 SRV genome sequence was identified. All the short reads obtained were remapped to the SRV-Vero  
7 genome sequence by BWA-SW mapping, followed by the extraction of genetic variations using the  
8 Sequence Alignment/Map program (SAMtools)<sup>11</sup>.

9

1 **References associate with supplementary materials and methods**

- 2 1. Williams, L.J., Tabbaa, D.G., Li, N. *et al.* 2012, Paired-end sequencing of Fosmid libraries by  
3 Illumina, *Genome Res.*, **22**, 2241-2249.
- 4 2. Naito, K., Kaga, A., Tomooka, N. and Kawase, M. 2013, De novo assembly of the complete  
5 organelle genome sequences of azuki bean (*Vigna angularis*) using next-generation  
6 sequencers, *Breed Sci*, **63**, 176-182.
- 7 3. Martin, M. 2011, Cutadapt removes adapter sequences from high-throughput sequencing  
8 reads, *EMBNet J*, **17**.
- 9 4. Simpson, J.T. and Durbin, R. 2012, Efficient de novo assembly of large genomes using  
10 compressed data structures, *Genome Res.*, **22**, 549-556.
- 11 5. Boetzer, M., Henkel, C.V., Jansen, H.J., Butler, D. and Pirovano, W. 2011, Scaffolding  
12 pre-assembled contigs using SSPACE, *Bioinformatics*, **27**, 578-579.
- 13 6. Tamura, K., Stecher, G., Peterson, D., Filipski, A. and Kumar, S. 2013, MEGA6: Molecular  
14 Evolutionary Genetics Analysis version 6.0, *Mol. Biol. Evol.*, **30**, 2725-2729.
- 15 7. Edgar, R.C. 2004, MUSCLE: multiple sequence alignment with high accuracy and high  
16 throughput, *Nucleic Acids Res.*, **32**, 1792-1797.
- 17 8. Saitou, N. and Nei, M. 1987, The neighbor-joining method: a new method for reconstructing  
18 phylogenetic trees, *Mol. Biol. Evol.*, **4**, 406-425.
- 19 9. Kimura, M. 1980, A simple method for estimating evolutionary rates of base substitutions  
20 through comparative studies of nucleotide sequences, *J. Mol. Evol.*, **16**, 111-120.
- 21 10. Li, H. and Durbin, R. 2010, Fast and accurate long-read alignment with Burrows-Wheeler  
22 transform, *Bioinformatics*, **26**, 589-595.
- 23 11. Li, H., Handsaker, B., Wysoker, A. *et al.* 2009, The Sequence Alignment/Map format and  
24 SAMtools, *Bioinformatics*, **25**, 2078-2079.
- 25 12. Ruby, J.G., Bellare, P. and Derisi, J.L. 2013, PRICE: software for the targeted assembly of

1 components of (Meta) genomic sequence data, *G3*, **3**, 865-880.

2

3



1 **Legends to supplementary figures**

2

3 **Figure S1.** Karyotyping of AGM PBMC and Vero cells. (A) The chromosome number in female  
4 AGF PBMC based on 100 Giemsa-stained metaphases showed that the modal number was 60  
5 chromosomes. The loss or gain of one chromosome detected in two cells occurred during the cell  
6 culture for 11 days. (B) G-banded karyotype of AGM PBMC, showing  $2n=60, XX$ . (C,D) Examples  
7 of M-FISH on Vero metaphases. Although these two cells had 59 chromosomes, *der(7)* in these  
8 karyotypes differed from the main clone shown in Fig. 1D and *der(14)* was duplicated in D.

9

10 **Figure S2.** Sequence analyses of genomic deletions in Vero cells. (A) Sequencing of PCR  
11 amplicons are shown in Fig. 3. The PCR reaction mixtures of Vero JCRB0111 and  
12 AGM-PBMC were used as templates. Underlined primer names indicate the primers used  
13 in the sequencing reaction. Note that the sequence chromatogram of “chromosome13” in  
14 AGM-PBMC contained 2 sequences, which was consistent with the PCR analysis. (B)  
15 Predicted models of genomic alleles in AGM-PBMC and Vero cells.

16

17 **Figure S3.** Distribution of heterozygous single nucleotide variants (SNV) density and the  
18 homozygous to heterozygous SNV ratio in the 1Mb-size window. The lighter area  
19 represents the higher density of windows. The distribution was bimodal and the lower left  
20 peak corresponded to potential loss-of-heterozygosity (LOH) regions. On the basis of the  
21 distribution, the cut-off criteria were set as follows: heterozygosity  $< 0.0005$  and the  
22 homozygous to heterozygous SNV ratio  $< 0.2$ .

23

1

2 **Table S1.** Summary of genome-sequencing libraries of Vero JCRB0111 cells.

---

| Library      | median insert size <sup>a</sup> | Read length | Read number<br>(million) <sup>b</sup> | Scaffold N50 (kb) |
|--------------|---------------------------------|-------------|---------------------------------------|-------------------|
| Pair-end     | 302                             | 101         | 2,554                                 | 16.6              |
| Mate-pair #1 | 1606                            | 101         | 261                                   | 37.7              |
| Mate-pair #2 | 7206                            | 101         | 74                                    | 314.0             |
| Mate-pair #3 | 18342                           | 101         | 56                                    | 507.9             |

---

3

4 a) estimated in the scaffolding process

5 b) number of reads after the quality filter

6

7

1

2 **Table S2.** Comparison of mitochondrial genome sequences between the Vero cell line and  
3 *Chlorocebus* species.

| Species name                   | Genbank acc. | match | mismatch | divergence |
|--------------------------------|--------------|-------|----------|------------|
| <i>Chlorocebus aethiops</i>    | NC_007009.1  | 15169 | 891      | 0.055      |
| <i>Chlorocebus pygerythrus</i> | NC_009747.1  | 15249 | 951      | 0.059      |
| <i>Chlorocebus sabaeus</i>     | NC_008066.1  | 16120 | 108      | 0.007      |
| <i>Chlorocebus tantalus</i>    | NC_009748.1  | 15280 | 903      | 0.056      |

4

5

1  
2  
3  
4  
5  
6  
7

**Table S3.** Number of SNVs and small indels in the Vero cell line genome using the rhesus macaque genome sequence as a reference.

|                     | SNVs                 | Deletions         | Insertions        |
|---------------------|----------------------|-------------------|-------------------|
| Nonsynonymous       | 101,893/32,384       | –                 | –                 |
| Synonymous          | 159,454/28,168       | 1,031/249         | 889/114           |
| Nonsense            | 1,334/969            | 1,492/578         | 1,388/261         |
| Untranslated region | 199,398/33,699       | 12,595/1891       | 12,322/1065       |
| Intron              | 1,616,4215/1,967,661 | 875,631/109,769   | 845,617/63,083    |
| Intergenic          | 34,541,805/5,283,726 | 1,728,114/253,188 | 1,674,883/143,782 |
| Total               | 51,168,099/7,346,607 | 2,618,863/365,675 | 2,535,049/208,305 |

\* Homozygous and heterozygous changes are shown to the left and right of the slashes, respectively. Frameshifting and non-frameshifting indels were classified into nonsense and synonymous categories, respectively.

1  
2

**Table S4.** Summary of large deletions in the Vero JCRB0111 cell genome.

| Accession      | Chromosome              | Strand | txStart  | txEnd    | Exon count | Gene name    |
|----------------|-------------------------|--------|----------|----------|------------|--------------|
| AGM position   | chr12_50661238:8852739  |        |          |          |            |              |
| MMU position   | chr15:47636646-56737738 |        |          |          |            |              |
| XM_002800070.1 | chr15                   | -      | 47877989 | 47892767 | 2          | LOC100430678 |
| XM_001104190.2 | chr15                   | +      | 47894478 | 49163487 | 7          | LINGO2       |
| XM_002800072.1 | chr15                   | +      | 49521355 | 49548196 | 11         | C15H9orf72   |
| XM_001104813.2 | chr15                   | +      | 49565881 | 49768793 | 4          | LOC706919    |
| XM_001104958.2 | chr15                   | -      | 49570708 | 49571340 | 1          | LOC707234    |
| XM_002800073.1 | chr15                   | +      | 49697993 | 49698730 | 2          | LOC100423218 |
| XM_001105128.2 | chr15                   | +      | 49798331 | 49810364 | 8          | C15H9orf11   |
| XM_001105270.2 | chr15                   | -      | 49863954 | 49985846 | 23         | TEK          |
| XM_001105415.2 | chr15                   | -      | 50030368 | 50148315 | 20         | IFT74        |
| XM_001105486.2 | chr15                   | +      | 50093629 | 50108941 | 5          | LRRC19       |
| XM_001105698.2 | chr15                   | +      | 50156501 | 50198501 | 14         | PLAA         |
| XM_001106045.2 | chr15                   | +      | 50210238 | 50263005 | 6          | C15H9orf82   |
| XM_001106111.2 | chr15                   | +      | 51393196 | 51394111 | 1          | CCDC89       |
| XM_001106373.2 | chr15                   | +      | 53236498 | 53371636 | 7          | ELAVL2       |
| XM_001106627.2 | chr15                   | -      | 54599731 | 54604567 | 2          | DMRTA1       |
| XM_001097962.2 | chr15                   | +      | 54650989 | 54780607 | 2          | LOC709444    |
| XM_001106881.2 | chr15                   | -      | 54967969 | 54986461 | 2          | HNRPA1       |
| XM_001107263.2 | chr15                   | +      | 55028382 | 55033946 | 2          | CDKN2B       |
| XM_001098554.2 | chr15                   | +      | 55060775 | 55068354 | 4          | CDKN2A       |
| XM_001107077.2 | chr15                   | -      | 55157607 | 55210950 | 8          | MTAP         |
| XM_001107329.2 | chr15                   | -      | 55567555 | 55568427 | 1          | LOC709559    |
| XM_001107458.2 | chr15                   | -      | 55604365 | 55604935 | 1          | IFNA8        |
| NM_001135794.1 | chr15                   | +      | 55637002 | 55637569 | 1          | IFNA2        |
| XM_001099165.2 | chr15                   | -      | 55666769 | 55674326 | 4          | IFNA1 or 13  |
| XM_001099374.2 | chr15                   | +      | 55683719 | 55684406 | 2          | IFNA6        |
| XM_002800107.1 | chr15                   | +      | 55702345 | 55706738 | 1          | LOC710804    |
| XM_001107576.2 | chr15                   | +      | 55738544 | 55739315 | 1          | IFNA14       |
| XM_001107635.2 | chr15                   | +      | 55746743 | 55747313 | 1          | IFNA4        |
| XM_001107693.2 | chr15                   | +      | 55756603 | 55757173 | 1          | LOC710654    |
| XM_001107754.2 | chr15                   | +      | 55769988 | 55770558 | 1          | IFNA17       |
| XM_001107817.2 | chr15                   | +      | 55774329 | 55774899 | 1          | IFNA4        |
| XM_001107884.2 | chr15                   | +      | 55778756 | 55779326 | 1          | IFNA17       |
| XM_001107940.2 | chr15                   | +      | 55803649 | 55804219 | 1          | IFNA17       |
| XM_001107999.2 | chr15                   | +      | 55818498 | 55819068 | 1          | IFNA17       |
| XM_001108051.2 | chr15                   | +      | 55822820 | 55823387 | 1          | IFNA21       |
| XM_001108113.2 | chr15                   | +      | 55840228 | 55841195 | 1          | IFNW1        |
| NM_001135795.1 | chr15                   | +      | 55915846 | 55916410 | 1          | IFNB1        |

|                |                           |   |           |           |    |           |
|----------------|---------------------------|---|-----------|-----------|----|-----------|
| XM_001099778.2 | chr15                     | + | 55962896  | 55999161  | 9  | KIAA1797  |
| XM_002800120.1 | chr15                     | - | 55998516  | 56316036  | 42 | KIAA1797  |
| XM_001108265.2 | chr15                     | + | 56308948  | 56309811  | 1  | LOC711644 |
| XM_001108646.2 | chr15                     | + | 56376264  | 56658076  | 10 | MLLT3     |
| AGM position   | chr21_115702018:572661    |   |           |           |    |           |
| MMU position   | chr3:184424652-184999217  |   |           |           |    |           |
| XM_001094652.2 | chr3                      | + | 183454124 | 185713854 | 24 | CNTNAP2   |
| AGM position   | chr21_115967186:96000     |   |           |           |    |           |
| MMU position   | chr3:184700740-184795247  |   |           |           |    |           |
| XM_001094652.2 | chr3                      | + | 183454124 | 185713854 | 24 | CNTNAP2   |
| AGM position   | chr9_79491540:293541      |   |           |           |    |           |
| MMU position   | chr9:85591097-85888674    |   |           |           |    |           |
| XM_001099261.2 | chr9                      | - | 84959245  | 86303176  | 18 | PRKG1     |
| AGM position   | chr7_39221662:198099      |   |           |           |    |           |
| MMU position   | chr5:83835008-84051641    |   |           |           |    |           |
| XM_001095828.2 | chr5                      | + | 83083150  | 83850701  | 9  | CCSER1    |
| XM_001101881.1 | chr5                      | - | 83896501  | 83898179  | 1  | LOC704348 |
| AGM position   | chr10_504044:1327         |   |           |           |    |           |
| MMU position   | chr13:136225605-136226934 |   |           |           |    |           |
| no gene        |                           |   |           |           |    |           |
| AGM position   | chr13_67374655:1268       |   |           |           |    |           |
| MMU position   | chr4:102475829-102477104  |   |           |           |    |           |
| XM_001088619.2 | intron                    |   |           |           |    | AIM1      |
| AGM position   | chr15_12462694:1372       |   |           |           |    |           |
| MMU position   | chr2:109860749-109862122  |   |           |           |    |           |
| XM_001101914.2 | intron                    |   |           |           |    | LOC712808 |
| AGM position   | chr23_50391086:1316       |   |           |           |    |           |
| MMU position   | chr6:144295261-144296573  |   |           |           |    |           |
| no gene        |                           |   |           |           |    |           |
| AGM position   | chr2_9021672:1048         |   |           |           |    |           |
| MMU position   | chr10:9442183-9443282     |   |           |           |    |           |
| no gene        |                           |   |           |           |    |           |

1 Chr, chromosome; txStart/txEnd, transcriptional start/transcriptional end.

2

1 **Table S5.** Single nucleotide mutation and insertion position and mix population rate of the truncated  
 2 SRV provirus sequence in Vero JCRB0111.

| Position | Reference sequence | Variant sequence | Total depth | Reference frequency (%) | Variant frequency (%) | Variant type | Gene       | Detected mutation | Amino acid substitution |
|----------|--------------------|------------------|-------------|-------------------------|-----------------------|--------------|------------|-------------------|-------------------------|
| 5671     | T                  | A                | 6911        | 75.3                    | 24.7                  | stop gained  | <i>pol</i> | tta>tAa           | L788stop                |
| 6503     | C                  | +A               | 3945        | 86.8                    | 9.3                   | frame-shift  | <i>env</i> |                   |                         |
| 7100     | C                  | T                | 5646        | 91.8                    | 8.1                   | stop gained  | <i>env</i> | cga>Tga           | R379stop                |
| 7586     | C                  | T                | 2373        | 84.7                    | 15.2                  | stop gained  | <i>env</i> | cga>Tga           | R541stop                |

3

4

1 **Table S6.** PCR primers used to validate deletions.

|         |     |                                |
|---------|-----|--------------------------------|
| Chr12   | s1  | CCTTAGCAACATAATTCATGTCAGCCCA   |
|         | as1 | CTCAGTTTTGGGTTCCCTCCTCTGGT     |
|         | s2  | GTGCCATCCTGAACTCAGAGATTACG     |
|         | as2 | CAGTCTTAGGCACCTTTGGTTTGCT      |
| Chr21-1 | s1  | CCTGACGACTCAATGTCCTGCTTC       |
|         | as1 | TGTTCCACGCTCCAGAATTAGTCCACG    |
|         | s2  | GCCTGAAAGATGAAAGAATGGAGTCACAG  |
|         | as2 | CTGGTTCACAAGCACCAACTGTTAAGC    |
| Chr21-2 | s1  | CCTGTCGGTAGATCAAGGTGTTGAG      |
|         | as1 | CTCCTTTAACAAGACCAGTCTCTTCACAG  |
|         | s2  | CAAGCAGGAACTGAACTGTGAGCTAAG    |
|         | as2 | GAATGCTGCAGATGACTCCTGTATTCC    |
| Chr9    | s1  | GTCAGGATCATTGAGGAGATAGGCTTTG   |
|         | as1 | CTGAGTCACAGAACTTGGACATCTAGTC   |
|         | s2  | CAAGAGGTTAAAGAGAGCCCTTAGAGATTC |
|         | as2 | GAGTTATGTGCGGAGACCTGAAGAC      |
| Chr7    | s1  | CCGAGAAGTCAGCTGTTAGTCTGATG     |
|         | as1 | GCCACAGTCAGGAATGACATATTGGC     |
|         | s2  | GTGGGAAAGACATTAAGGCACTGTGG     |
|         | as2 | GAGGGAGAAGAAAAACACAACCTGG      |
| Chr1    | s1  | ATCTCACAGGGAAAGCTGCCACC        |
|         | as1 | TGGAATTGGGGTTAAACGGGTTTGAAGG   |
| Chr10   | s1  | TCCTCCCTGGTACTCTGTCCTG         |
|         | as1 | CCATTCCAGTAGGCACACACAGTG       |
| Chr13   | s1  | TAGGGACGCTGGCCTTCAGAG          |
|         | as1 | GTTCTATCACAACCTTTGCCCTATGAC    |
| Chr15   | s1  | TAGACAAGCTCCCTTTGTAAGTGGTCAC   |
|         | as1 | TGGTTCCGAACTCCTAAGCTCAAGTG     |

2

3



**A**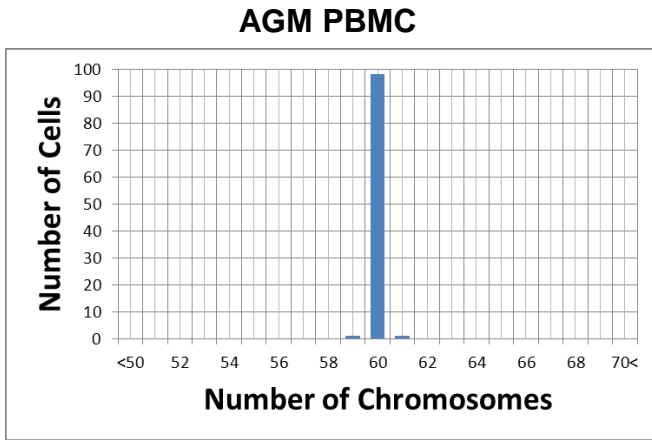**B****AGM PBMC, G-banding**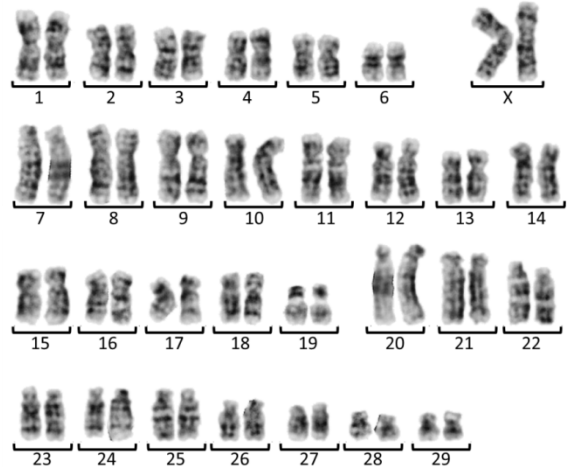**C****Vero (minor type), M-FISH**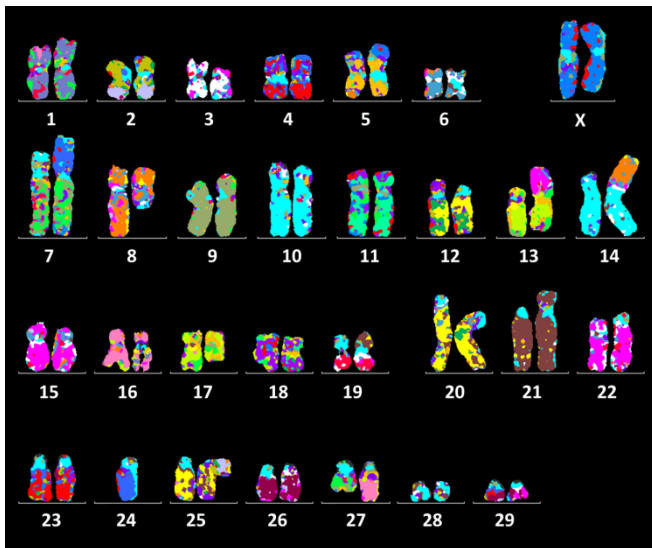**D****Vero (minor type), M-FISH**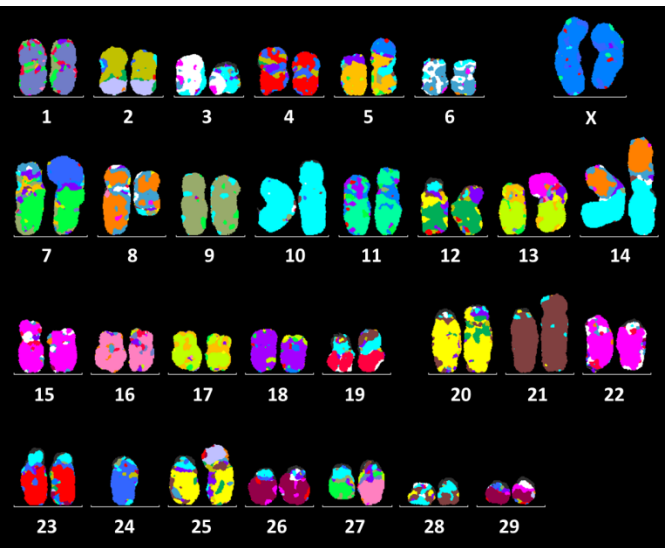

**A****Chr12****AGM-PBMC (s1↔as2)****AGM-PBMC (s2↔as1)**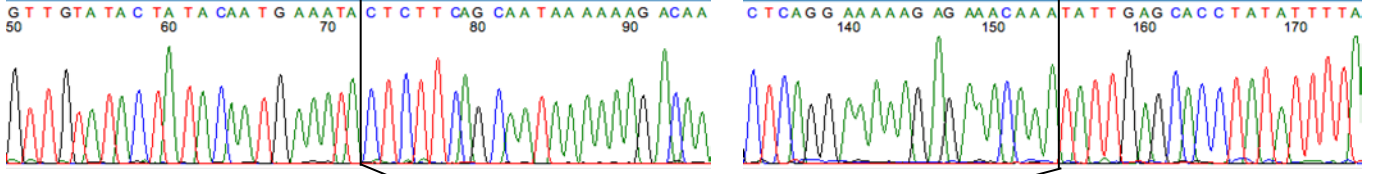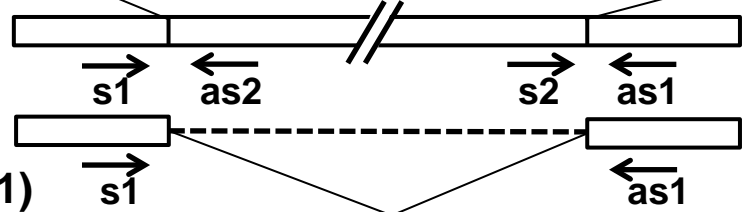**Vero (s1↔as1)****s1****as1**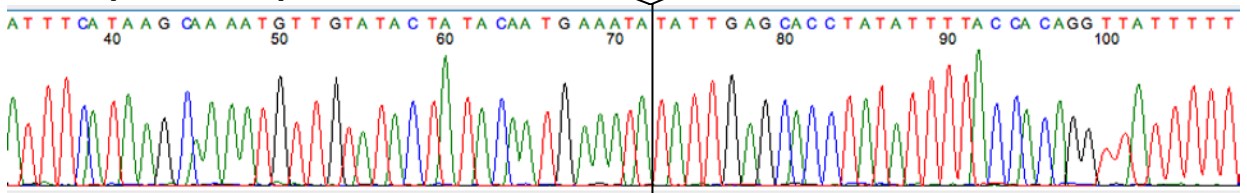**Chr21-1****AGM-PBMC (s1↔as2)****AGM-PBMC (s2↔as1)**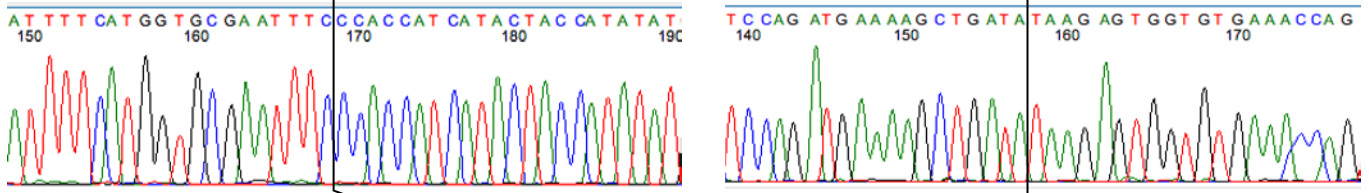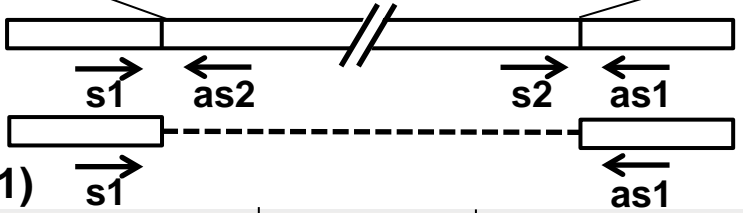**Vero (s1↔as1)****s1****as1**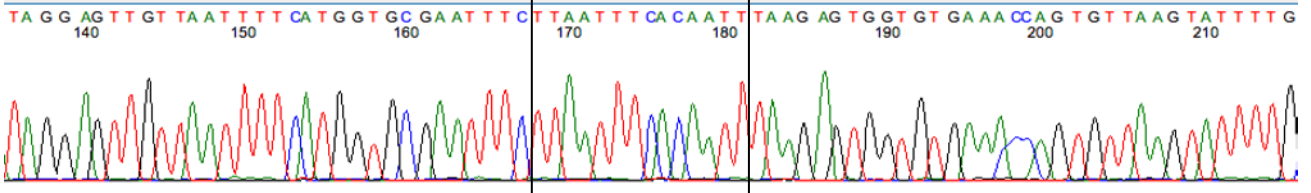**Vero (s2↔as1)****s2** **as1**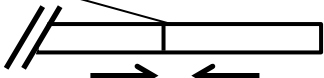

## Chr21-2

### AGM-PBMC (s1↔as2)

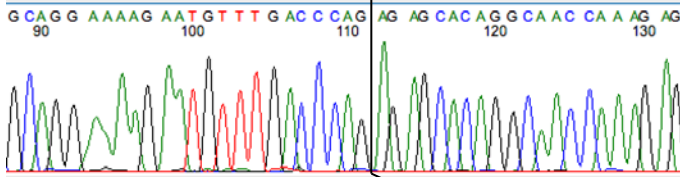

### AGM-PBMC (s2↔as1)

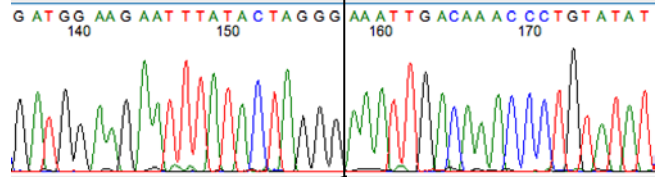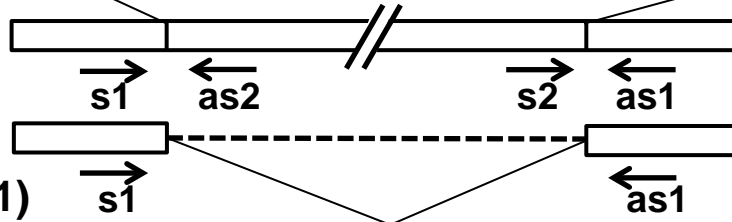

### Vero (s1↔as1)

s1

as1

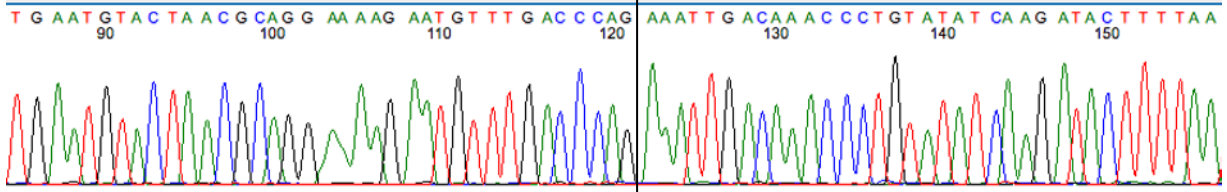

## Chr9

### AGM-PBMC (s1↔as2)

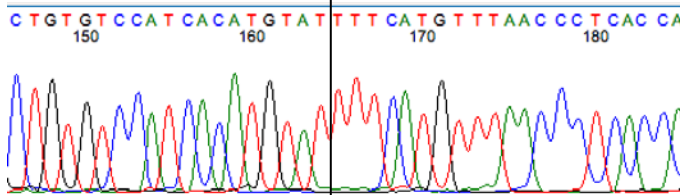

### AGM-PBMC (s2↔as1)

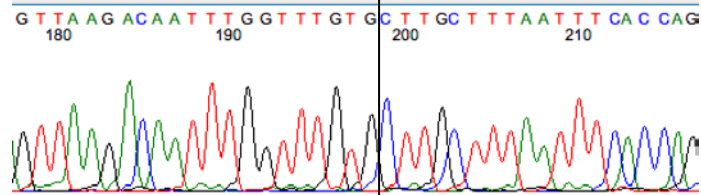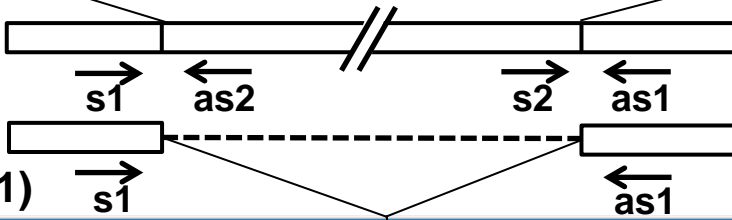

### Vero (s1↔as1)

s1

as1

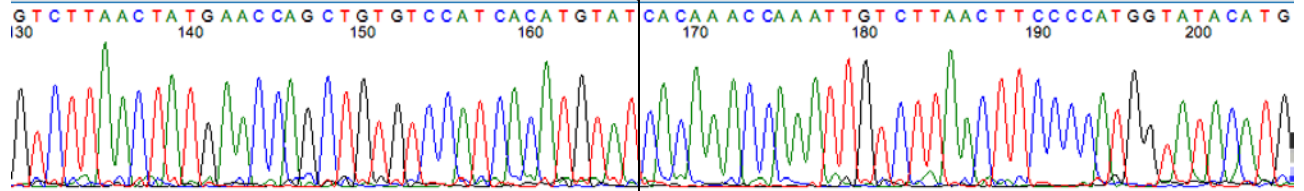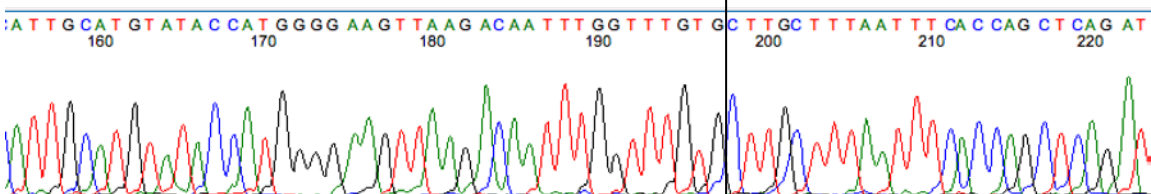

### Vero (s2↔as1)

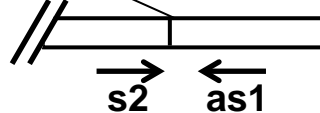

## Chr7

### AGM-PBMC (s1↔as2)

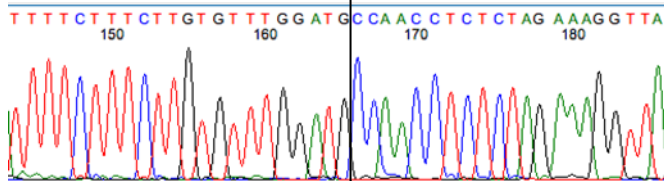

### AGM-PBMC (s2↔as1)

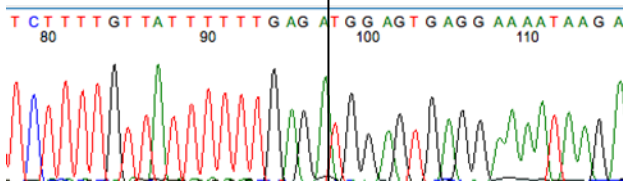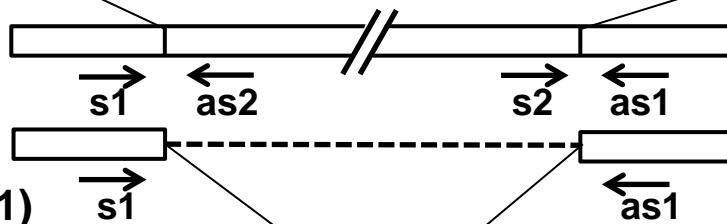

### Vero (s1↔as1)

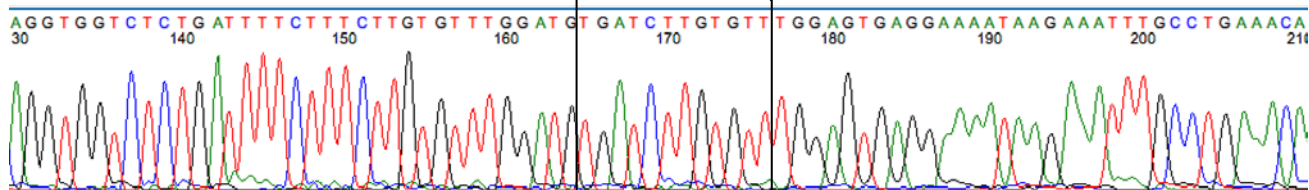

## Chr1

### AGM-PBMC (s1↔as1)

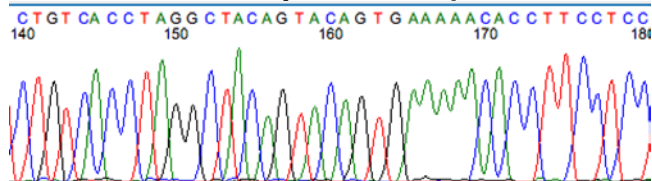

### Vero (s1↔as1)

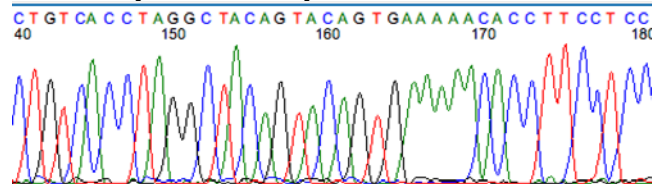

## Chr10

### AGM-PBMC (s1↔as1)

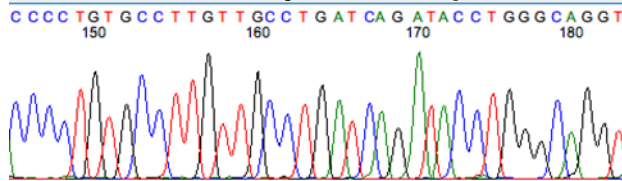

### Vero (s1↔as1)

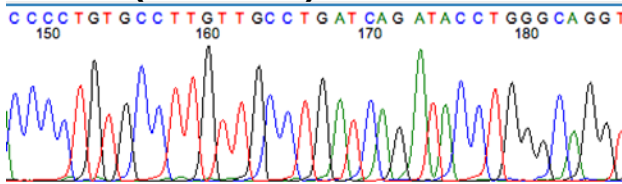

## Chr23

### AGM-PBMC (s1↔as1)

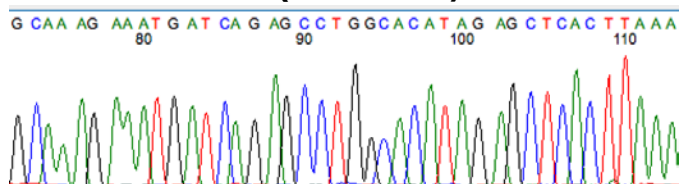

### Vero (s1↔as1)

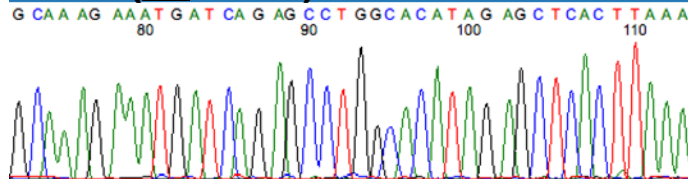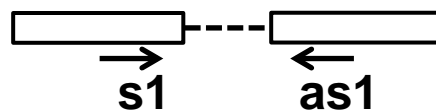

# Chr13

## AGM-PBMC (s1↔as1)

C C T T G A A A T A A A A T C G A G A A G T A C T G A G A G A G A T C T C T A A G T A A A T T A T T G C A T A T C C A C A T T A T G G A A  
210 220 230 240 250 260 270

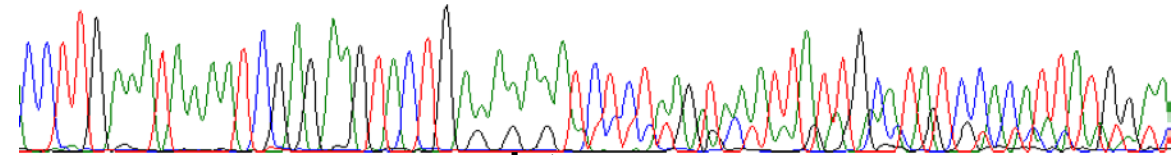

mixture

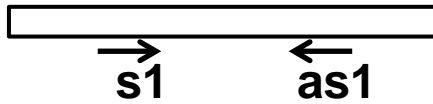

## Vero (s1↔as1)

C C T T G A A A T A A A A T C G A G A A G T A C T G A A A A A A A T C T C T A A G T A A A T T A T T G C A T A T C C A C A T T A T G G A A  
210 220 230 240 250 260 270

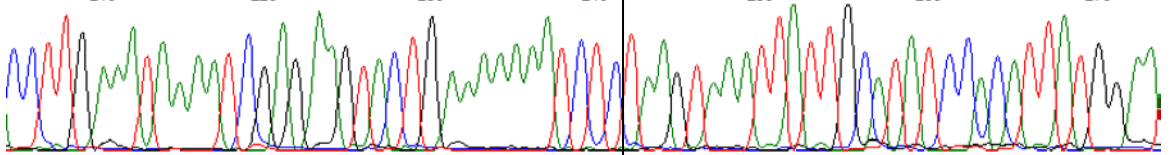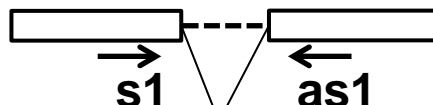

# Chr15

## AGM-PBMC (s1↔as1)

A C C T C C A C T C C C T C C C G T A A T T C T T C T G T T C C T A T A G T C T C C T G T T T G C T T C T C A A G G C T A C T T A T G T A T A T T T T T A G C  
160 170 180 190 200 210 220 230

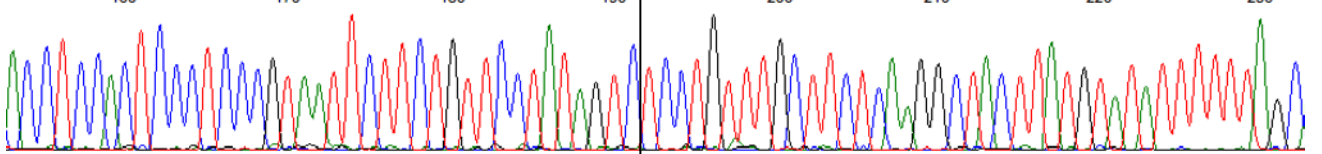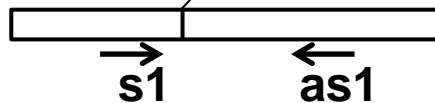

## Vero (s1↔as1)

A C C T C C A C T C C C T C C C G T A A T T C T T C T G T T C C T A T A G T C T T T T G C C A G A T G C T T T T C T T A G A C A G A C T C C A C T T C T T T C C T  
160 170 180 190 200 210 220 230

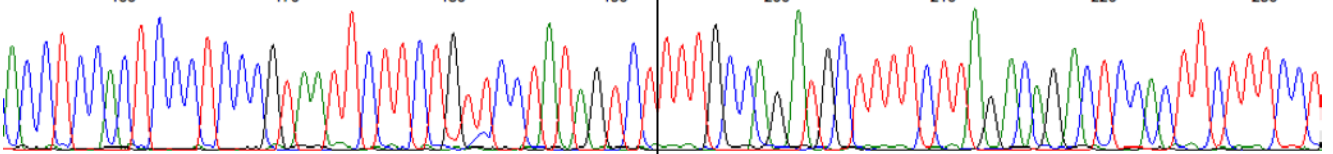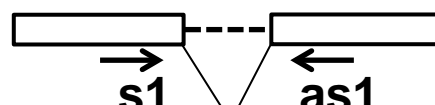

**B**Chr12 Chr21-2 Chr7**AGM-PBMC**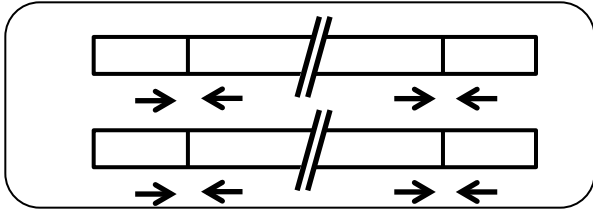**Vero**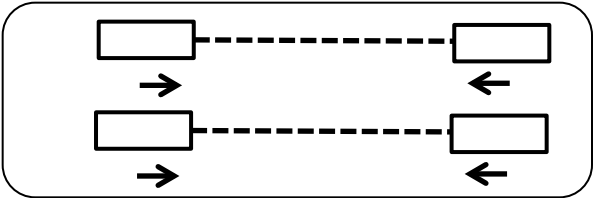Chr21-1 Chr9**AGM-PBMC**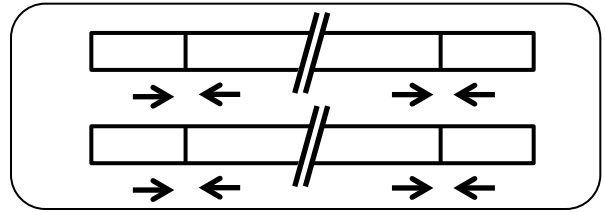**Vero**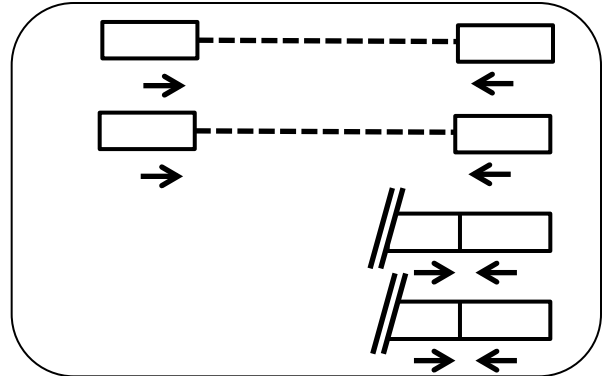

or

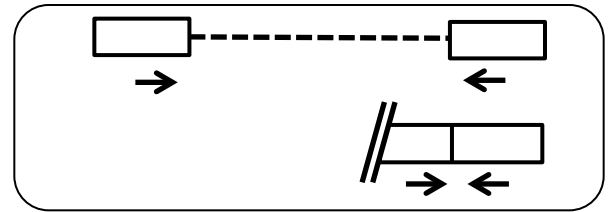Chr1 Chr10**AGM-PBMC**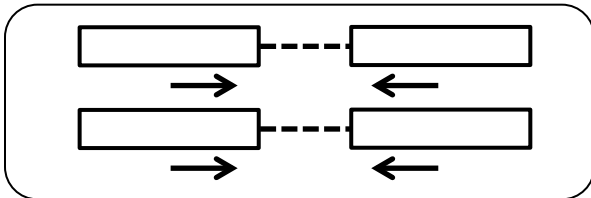**Vero**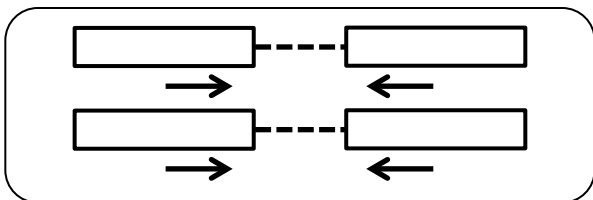Chr13**AGM-PBMC**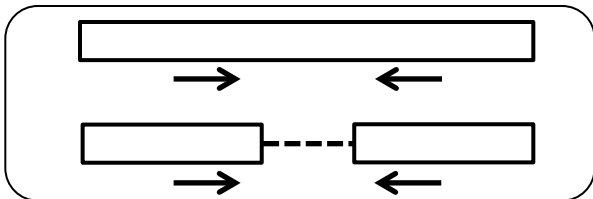**Vero**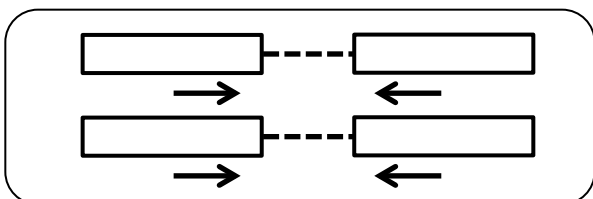Chr15**AGM-PBMC**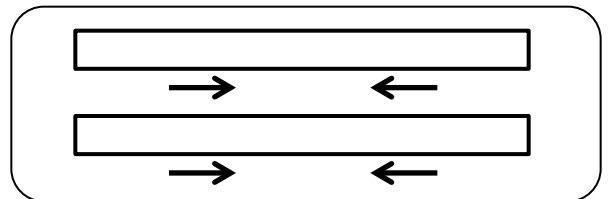**Vero**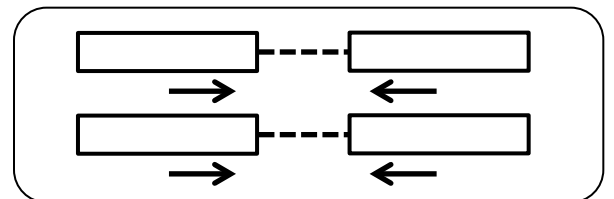

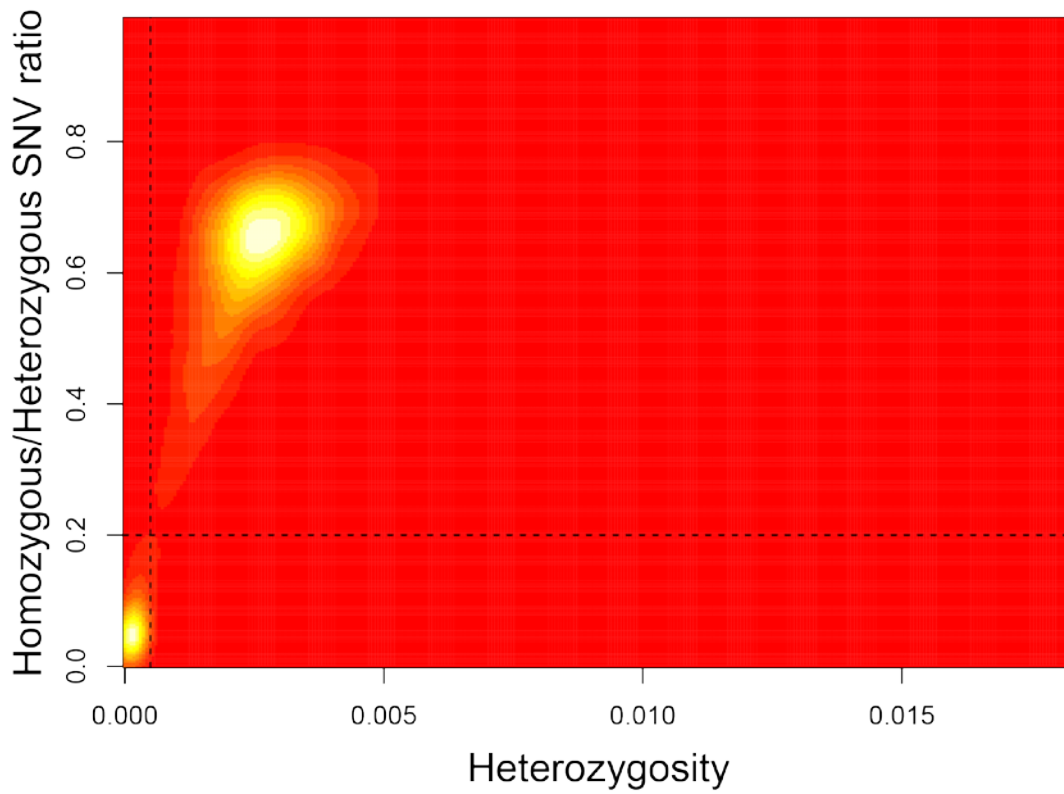

Supplementary Figure 3
